# Supplementary material
Source: HighWire-hosted journal article supplement (https://www.annfammed.org/highwire/filestream/14773/field_highwire_adjunct_files/0/HealioPrimaryCare.pdf)
Supplement: HealioPrimaryCare.pdf [file HealioPrimaryCare.pdf]

Healio Primary Care  
Practice Management  
March 30, 2022  
1 min watch

## **VIDEO: More resources needed to strengthen primary care, improve health equity**

<https://www.healio.com/news/primary-care/20220330/video-more-resources-needed-to-strengthen-primary-care-improve-health-equity>
